# Supplementary material for: Using satellite-based estimates of evapotranspiration and groundwater changes to determine anthropogenic water fluxes in land surface models
Source: Copernicus journal article supplement (doi:10.5194/gmd-8-3021-2015), 2015-10-02

(a) Evapotranspiration from 3 Estimations and 9 Land Model Simulations

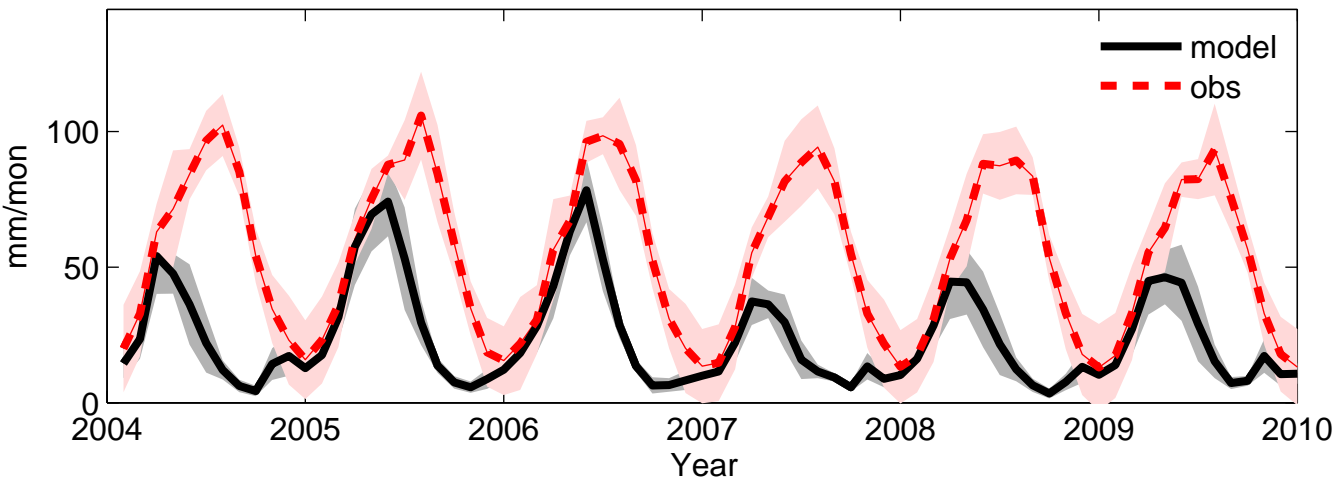

(b) Precipitation from PRISM

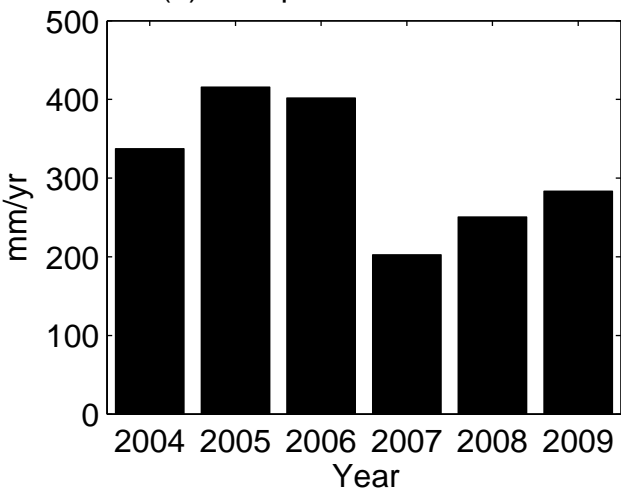

(c) Same as (a), but for Climatology

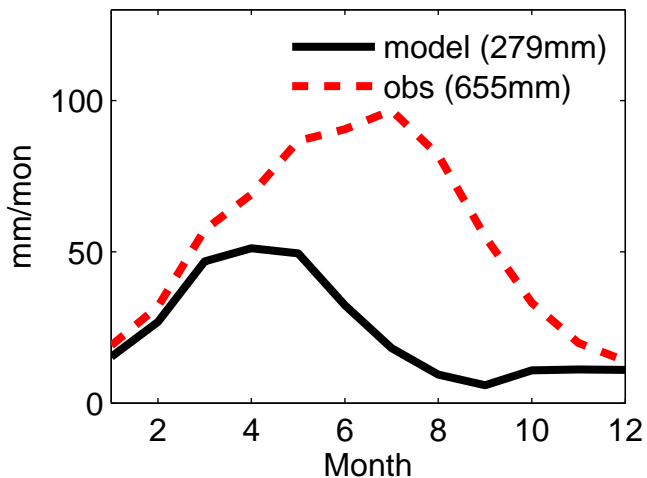

Supplement: Supplementary file 1 [file gmd-8-3021-2015-supplement.zip]
