# Supplementary material for: Using satellite-based estimates of evapotranspiration and groundwater changes to determine anthropogenic water fluxes in land surface models
Source: Copernicus journal article supplement (doi:10.5194/gmd-8-3021-2015), 2015-10-02
Supplement: Supplementary file 3 [file gmd-8-3021-2015-supplement.zip]

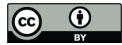

## *Supplement of*

# **Using satellite-based estimates of evapotranspiration and groundwater changes to determine anthropogenic water fluxes in land surface models**

**R. G. Anderson et al.**

*Correspondence to:*

- [gmd-8-3021-2015-supplement-title-page.pdf](#)
- [gmd-2015-28-f01-thumb.png](#)
- [gmd-2015-28-f01-web.png](#)
- [gmd-2015-28-f01.jpg](#)
- [gmd-2015-28-f02-thumb.png](#)
- [gmd-2015-28-f02-web.png](#)
- [gmd-2015-28-f02.png](#)
- [gmd-2015-28-f03-thumb.png](#)
- [gmd-2015-28-f03-web.png](#)
- [gmd-2015-28-f03.pdf](#)
- [gmd-2015-28-f04-thumb.png](#)
- [gmd-2015-28-f04-web.png](#)
- [gmd-2015-28-f04.pdf](#)
- [gmd-2015-28-f05-thumb.png](#)
- [gmd-2015-28-f05-web.png](#)
- [gmd-2015-28-f05.pdf](#)
- [gmd-2015-28-f06-thumb.png](#)
- [gmd-2015-28-f06-web.png](#)
- [gmd-2015-28-f06.pdf](#)
- [gmd-2015-28-f07-thumb.png](#)

- gmd-2015-28-f07-web.png
- gmd-2015-28-f07.pdf
- gmd-2015-28.tex

The copyright of individual parts of the supplement might differ from the CC-BY 3.0 licence.
