# Supplementary figures and images for: Using satellite-based estimates of evapotranspiration and groundwater changes to determine anthropogenic water fluxes in land surface models
Source: Copernicus journal article supplement (doi:10.5194/gmd-8-3021-2015), 2015-10-02

Climatological Evapotranspiration, Averaged in Central Valley

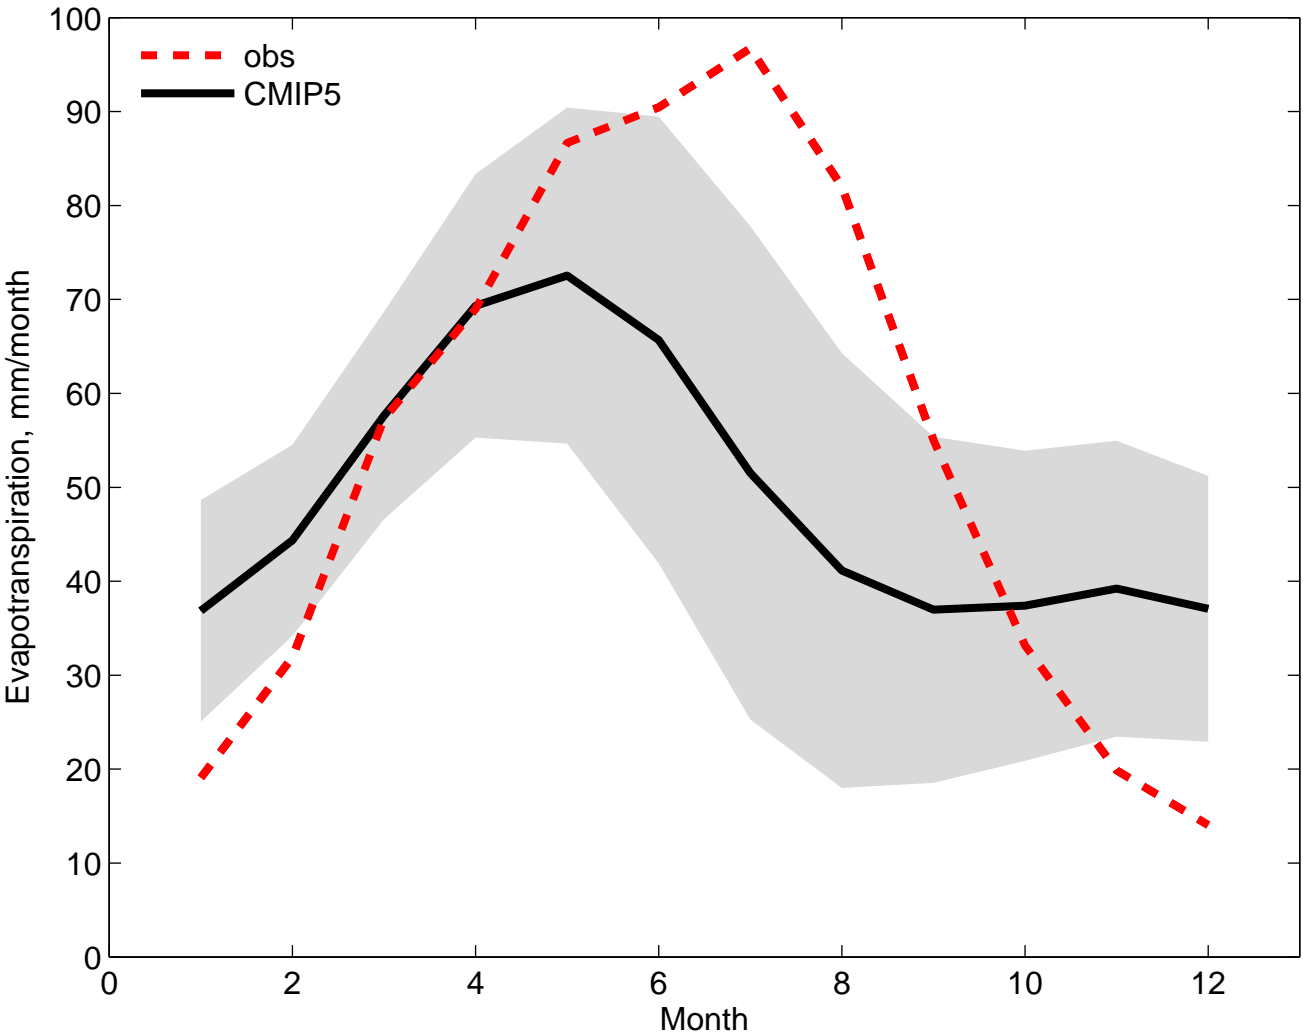

Supplement: Supplementary file 2 [file gmd-8-3021-2015-supplement.zip]

scatter plot for guessed and simulated groundwater recharge

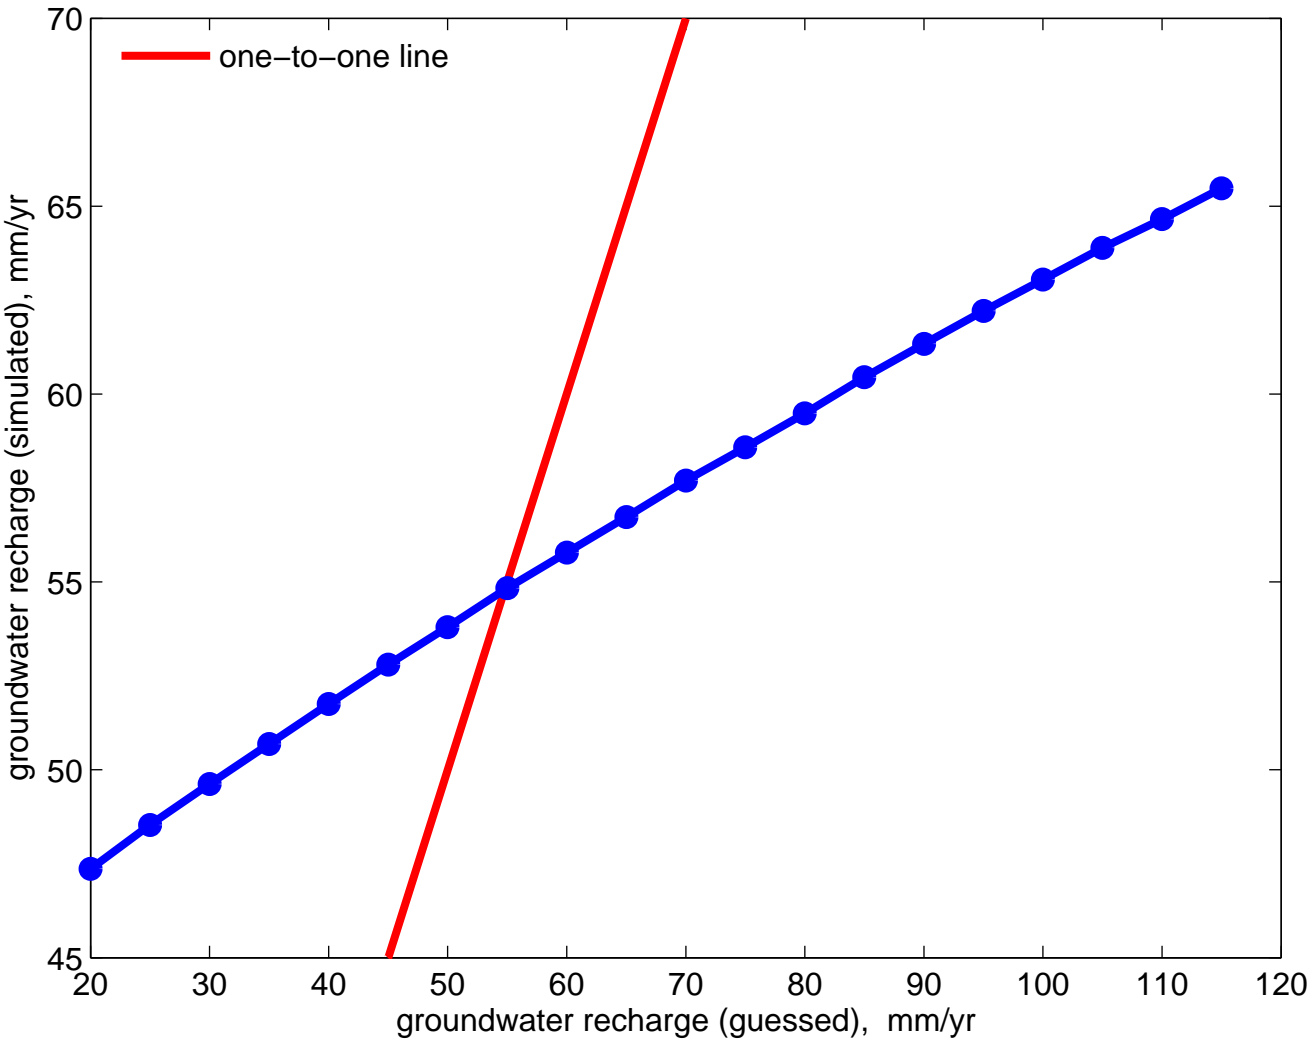

Supplement: Supplementary file 4 [file gmd-8-3021-2015-supplement.zip]

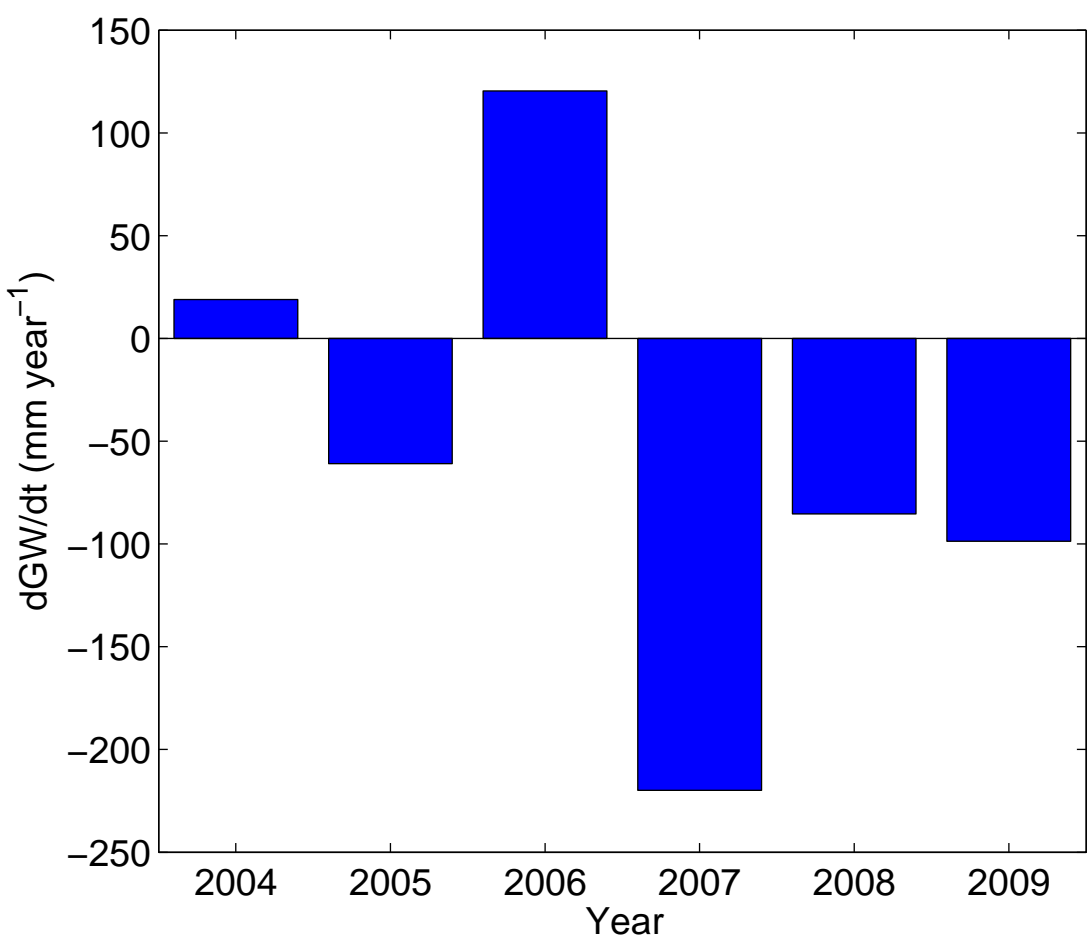

Supplement: Supplementary file 5 [file gmd-8-3021-2015-supplement.zip]

Evapotranspiration from 3 Estimations and Land Model Simulation with Irrigation

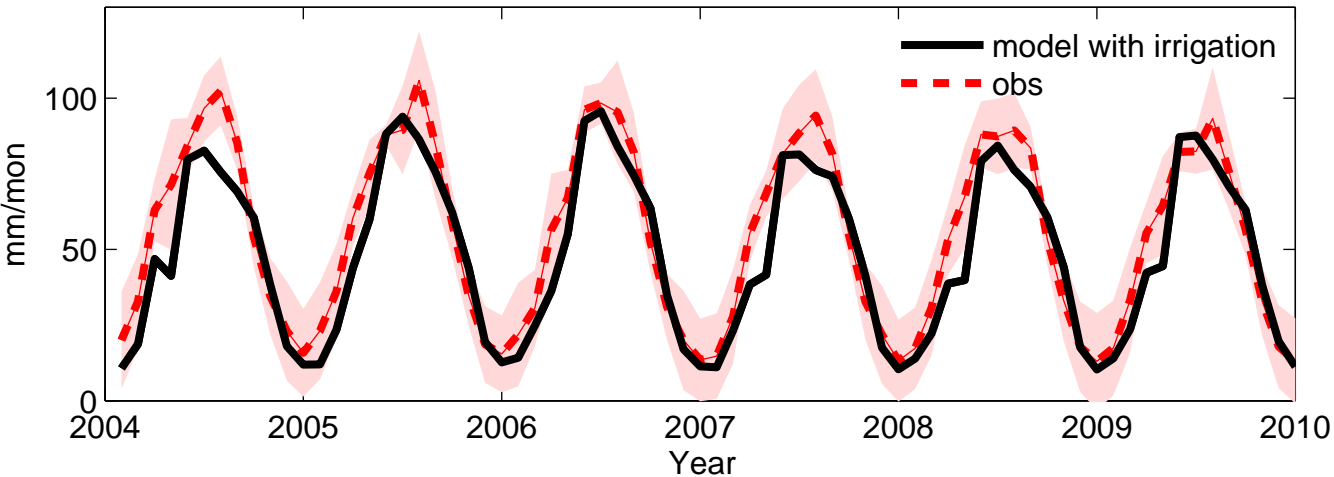

Supplement: Supplementary file 6 [file gmd-8-3021-2015-supplement.zip]
